# Supplementary material
Source: publisher site journal article supplement (https://www.dovepress.com/article/589703)
Supplement: Supplementary file 1 [file 589703%20Supplementary%20Table%201.docx]

**Supplementary Table 1.** Pairwise comparisons for primary and secondary outcomes

| **Outcome** | **Timepoint** |  |  |  |  |  |
| --- | --- | --- | --- | --- | --- | --- |
|  | **1 vs 2** | **1 vs 3** | **1 vs 4** | **2 vs 3** | **2 vs 4** | **3 vs 4** |
| **VA** (logMAR) |  |  |  |  |  |  |
| mean difference | 0.12 | 0.19 | 0.26 | 0.07 | 0.14 | 0.07 |
| p value | **0.00676** | **< 0.00001** | **< 0.00001** | **0.01539** | **0.00256** | **0.04457** |
| z-score | -2.47 | -4.13 | -4.02 | -2.16 | -2.80 | -1.70 |
| **CST** (μm) |  |  |  |  |  |  |
| mean difference | 117.35 | 146.39 | 142.43 | 29.04 | 25.09 | -3.96 |
| p value | **< 0.00001** | **< 0.00001** | **< 0.00001** | **< 0.00001** | **0.00298** | 0.16354 |
| z-score | -5.17 | -5.68 | -5.48 | -4.14 | -2.75 | -0.98 |
| **PED Height** (μm) |  |  |  |  |  |  |
| mean difference | 80.76 | 183.89 | 198.91 | 103.15 | 118.17 | 15.02 |
| p value | **0.00453** | **0.00013** | **0.00022** | **0.00187** | **0.00621** | 0.27425 |
| z-score | -2.61 | -3.66 | -3.51 | -2.90 | -2.50 | -0.60 |

Pairwise comparisons for primary outcomes of visual acuity (VA), central subfield thickness (CST), and pigment epithelial detachment (PED) height at baseline (timepoint 1) compared to after one faricimab injection (timepoint 2), three injections (timepoint 3), and last follow up (timepoint 4). Differences in means between timepoints presented as raw values in respective units of logMAR (VA) or microns (μm, CST and PED height). Pairwise comparisons performed using Wilcoxon signed rank tests for non-parametric outcomes of VA, CST, and PED height. Significant differences are bolded.
